# Supplementary material
Source: ML conference proceedings conference paper supplement (https://proceedings.neurips.cc/paper_files/paper/2016/hash/f3144cefe89a60d6a1afaf7859c5076b-Abstract.html)
Supplement: Supplementary file [file f3144cefe89a60d6a1afaf7859c5076b-Supplemental.zip]

**Supplementary Material (Appendix)**  
**for "Linear Contextual Bandits with Knapsacks, S. Agrawal, N. R. Devanur, NIPS 2016"**

## A Concentration Inequalities

**Lemma 6** (Azuma-Hoeffding inequality). *If a super-martingale  $(Y_t; t \geq 0)$ , corresponding to filtration  $\mathcal{F}_t$ , satisfies  $|Y_t - Y_{t-1}| \leq c_t$  for some constant  $c_t$ , for all  $t = 1, \dots, T$ , then for any  $a \geq 0$ ,*

$$\Pr(Y_T - Y_0 \geq a) \leq e^{-\frac{a^2}{2 \sum_{t=1}^T c_t^2}}.$$

## B Benchmark

*Proof of Lemma 1.* For an instantiation  $\omega = (X_t, V_t)_{t=1}^T$  of the sequence of inputs, let vector  $\mathbf{p}_t^*(\omega) \in \Delta^{K+1}$  denote the distribution over actions (plus no-op) taken by the *optimal adaptive policy* at time  $t$ . Then,

$$\overline{\text{OPT}} = \mathbb{E}_{\omega \sim \mathcal{D}^T} [\sum_{t=1}^T \mathbf{r}_t^\top \mathbf{p}_t^*(\omega)] \quad (13)$$

Also, since this is a feasible policy,

$$\mathbb{E}_{\omega \sim \mathcal{D}^T} [\sum_{t=1}^T V_t^\top \mathbf{p}_t^*(\omega)] \leq B\mathbf{1} \quad (14)$$

Construct a *static* context dependent policy  $\pi^*$  as follows: for any  $X \in [0, 1]^{m \times K}$ , define

$$\pi^*(X) := \frac{1}{T} \sum_{t=1}^T \mathbb{E}_{\omega} [\mathbf{p}_t^*(\omega) | X_t = X].$$

Intuitively,  $\pi^*(X)_a$  denotes (in hindsight) the probability that the optimal adaptive policy takes an action  $a$  when presented with a context  $X$ , averaged over all time steps. Now, by definition of  $\mathbf{r}(\pi)$ ,  $\mathbf{v}(\pi)$ , from above definition of  $\pi^*$ , and (13), (14),

$$\begin{aligned} T\mathbf{r}(\pi^*) &= T\mathbb{E}_{X \sim \mathcal{D}} [\boldsymbol{\mu}_*^\top X \pi^*(X)] = \mathbb{E}_{\omega} [\sum_{t=1}^T V_t \mathbf{p}_t^*(\omega)] = \overline{\text{OPT}}, \\ T\mathbf{v}(\pi^*) &= T\mathbb{E}_{X \sim \mathcal{D}} [W_*^\top X \pi^*(X)] = \mathbb{E}_{\omega} [\sum_{t=1}^T V_t \mathbf{p}_t^*(\omega)] \leq B\mathbf{1}, \end{aligned}$$

□

## C Hardness of linear AMO

In this section we show that finding the best linear policy is NP-Hard. The input to the problem is, for each  $t \in [T]$ , and each arm  $a \in [K]$ , a context  $\mathbf{x}_t(a) \in [0, 1]^m$ , and a reward  $r_t(a) \in [-1, 1]$ . The output is a vector  $\boldsymbol{\theta} \in \mathfrak{R}^m$  that maximizes  $\sum_t r_t(a_t)$  where

$$a_t = \arg \max_{a \in [K]} \{\mathbf{x}_t(a)^\top \boldsymbol{\theta}\}.$$

We give a reduction from the problem of learning halfspaces with noise [16]. The input to this problem is for some integer  $n$ , for each  $i \in [n]$ , a vector  $z_i \in [0, 1]^m$ , and  $y_i \in \{-1, +1\}$ . The output is a vector  $\boldsymbol{\theta} \in \mathfrak{R}^m$  that maximizes

$$\sum_{i=1}^n \text{sign}(z_i^\top \boldsymbol{\theta}) y_i.$$

Given an instance of the problem of learning halfspaces with noise, construct an instance of the linear AMO as follows. The time horizon  $T = n$ , and the number of arms  $K = 2$ . For each  $t \in [T]$ , the context of the first arm,  $\mathbf{x}_t(1) = z_t$ , and its reward  $r_t(1) = y_t$ . The context of the second arm,  $\mathbf{x}_t(2) = \mathbf{0}$ , the all zeroes vector, and the reward  $r_t(2)$  is also 0.

The total reward of a linear policy w.r.t a vector  $\boldsymbol{\theta}$  for this instance is

$$|\{i : \text{sign}(z_i^\top \boldsymbol{\theta}) = 1, y_i = 1\}| - |\{i : \text{sign}(z_i^\top \boldsymbol{\theta}) = 1, y_i = -1\}|.$$

It is easy to see that this is an affine transformation of the objective for the problem of learning halfspaces with noise.

## D Confidence ellipsoids

**Proof of Corollary 1.** The following holds with probability  $1 - \delta$ .

$$\begin{aligned} \sum_{t=1}^T |\tilde{\boldsymbol{\mu}}_t^\top \mathbf{x}_t - \boldsymbol{\mu}_*^\top \mathbf{x}_t| &\leq \sum_{t=1}^T \|\tilde{\boldsymbol{\mu}}_t - \boldsymbol{\mu}_*\|_{M_t} \|\mathbf{x}_t\|_{M_t^{-1}} \\ &\leq \left( \sqrt{m \ln \left( \frac{1+tm}{\delta} \right)} + \sqrt{m} \right) \sqrt{mT \ln(T)}. \end{aligned}$$

The inequality in the first line is a matrix-norm version of Cauchy-Schwartz (Lemma 7). The inequality in the second line is due to Lemmas 2 and 3. The lemma follows from multiplying out the two factors in the second line.  $\square$

**Lemma 7.** For any positive definite matrix  $M \in \mathbb{R}^{n \times n}$  and any two vectors  $\mathbf{a}, \mathbf{b} \in \mathbb{R}^n$ ,  $|\mathbf{a}^\top \mathbf{b}| \leq \|\mathbf{a}\|_M \|\mathbf{b}\|_{M^{-1}}$ .

*Proof.* Since  $M$  is positive definite, there exists a matrix  $M_{1/2}$  such that  $M = M_{1/2} M_{1/2}^\top$ . Further,  $M^{-1} = M_{-1/2}^\top M_{-1/2}$  where  $M_{-1/2} = M_{1/2}^{-1}$ .

$$\|\mathbf{a}^\top M_{1/2}\|^2 = \mathbf{a}^\top M_{1/2} M_{1/2}^\top \mathbf{a} = \mathbf{a}^\top M \mathbf{a} = \|\mathbf{a}\|_M^2.$$

Similarly,  $\|M_{-1/2} \mathbf{b}\|^2 = \|\mathbf{b}\|_{M^{-1}}^2$ . Now applying Cauchy-Schwartz, we get that

$$|\mathbf{a}^\top \mathbf{b}| = |\mathbf{a}^\top M_{1/2} M_{-1/2} \mathbf{b}| \leq \|\mathbf{a}^\top M_{1/2}\| \|M_{-1/2} \mathbf{b}\| = \|\mathbf{a}\|_M \|\mathbf{b}\|_{M^{-1}}.$$

$\square$

**Proof of Corollary 2.** Here, the first claim follows simply from definition of  $\tilde{W}_t(a)$  and the observation that with probability  $1 - \delta$ ,  $W^* \in \mathcal{G}_t$ . To obtain the second claim, apply Corollary 1 with  $\boldsymbol{\mu}_* = \mathbf{w}_{*j}$ ,  $\mathbf{y}_t = \mathbf{x}_t(a_t)$ ,  $\tilde{\boldsymbol{\mu}}_t = [\tilde{W}_t(a_t)]_j$  (the  $j^{\text{th}}$  column of  $\tilde{W}_t(a_t)$ ), to bound  $|\sum_t ([\tilde{W}_t(a_t)]_j - \mathbf{w}_{*j})^\top \mathbf{x}_t(a_t)| \leq \sum_t |([\tilde{W}_t(a_t)]_j - \mathbf{w}_{*j})^\top \mathbf{x}_t(a_t)|$  for every  $j$ , and then take the norm.  $\square$

## E Appendix for Section 3.2

**Proof of Theorem 2:** We will use  $\mathcal{R}'$  to denote the main term in the regret bound.

$$\mathcal{R}'(T) := O\left(m \sqrt{\ln(mdT/\delta) \ln(T) T}\right)$$

Let  $\tau$  be the stopping time of the algorithm. Let  $H_{t-1}$  be the history of plays and observations before time  $t$ , i.e.  $H_{t-1} := \{\boldsymbol{\theta}_\tau, X_\tau, a_\tau, r_\tau(a_\tau), \mathbf{v}_\tau(a_\tau), \tau = 1, \dots, t-1\}$ . Note that  $H_{t-1}$  determines  $\boldsymbol{\theta}_t, \hat{\boldsymbol{\mu}}_t, \hat{W}_t, \mathcal{G}_t$ , but it does not determine  $X_t, a_t, \tilde{W}_t$  (since  $a_t$  and  $\tilde{W}_t(a)$  depend on the context  $X_t$  at time  $t$ ). The proof is in 3 steps:

**Step 1:** Since  $\mathbb{E}[\mathbf{v}_t(a_t) | X_t, a_t, H_{t-1}] = W_*^\top \mathbf{x}_t(a_t)$ , we apply Azuma-Hoeffding inequality to get that with probability  $1 - \delta$ ,

$$\left\| \sum_{t=1}^\tau \mathbf{v}_t(a_t) - W_*^\top \mathbf{x}_t(a_t) \right\|_\infty \leq \mathcal{R}'(T). \quad (15)$$

Similarly, we obtain

$$\left| \sum_{t=1}^\tau r_t(a_t) - \boldsymbol{\mu}_*^\top \mathbf{x}_t(a_t) \right| \leq \mathcal{R}'(T). \quad (16)$$

**Step 2:** From Corollary 2, with probability  $1 - \delta$ ,

$$\left\| \sum_{t=1}^T (W_* - \tilde{W}_t(a_t))^\top \mathbf{x}_t(a_t) \right\|_\infty \leq \mathcal{R}'(T). \quad (17)$$

$$\left| \sum_{t=1}^T (\tilde{\boldsymbol{\mu}}_t(a_t) - \boldsymbol{\mu}_*)^\top \mathbf{x}_t(a_t) \right| \leq \mathcal{R}'(T). \quad (18)$$

It is therefore sufficient to bound the sum of the vectors  $\tilde{W}_t(a_t)^\top \mathbf{x}_t(a_t)$ , and similarly for  $\tilde{\boldsymbol{\mu}}_t(a_t)^\top \mathbf{x}_t(a_t)$ . We use the shorthand notation of  $\tilde{r}_t := \tilde{\boldsymbol{\mu}}_t(a_t)^\top \mathbf{x}_t(a_t)$ ,  $\tilde{r}_{\text{sum}} := \sum_{t=1}^T \tilde{r}_t$ ,  $\tilde{\mathbf{v}}_t := \tilde{W}_t(a_t)^\top \mathbf{x}_t(a_t)$  and  $\tilde{\mathbf{v}}_{\text{sum}} := \sum_{t=1}^T \tilde{\mathbf{v}}_t$  for the rest of this proof.

**Step 3:** The proof is completed by showing that

$$\mathbb{E}[\tilde{r}_{\text{sum}}] \geq \text{OPT} - Z\mathcal{R}'(T).$$

**Lemma 8.**

$$\sum_{t=1}^{\tau} \mathbb{E}[\tilde{r}_t | H_{t-1}] \geq \frac{\tau}{T} \text{OPT} + Z \sum_{t=1}^{\tau} \boldsymbol{\theta}_t \cdot \mathbb{E}[\tilde{\mathbf{v}}_t - \mathbf{1} \frac{B}{T} | H_{t-1}]$$

*Proof.* Let  $a_t^*$  be defined as the (randomized) action given by optimal static policy  $\pi^*$  for context  $X_t$ . Define  $r_t^* := \boldsymbol{\mu}_t(a_t^*)^\top \mathbf{x}_t(a_t^*)$  and  $\mathbf{v}_t^* := \tilde{W}_t(a_t^*)^\top \mathbf{x}_t(a_t^*)$ . By Corollary 2, with probability  $1 - \delta$ , we have that  $T\mathbb{E}[r_t^* | H_{t-1}] \geq \text{OPT}$ , and  $\mathbb{E}[\mathbf{v}_t^* | H_{t-1}] \leq \frac{B}{T} \mathbf{1}$ , where the expectation is over context  $X_t$  given  $H_{t-1}$ . By the choice made by the algorithm,

$$\begin{aligned} \tilde{r}_t - Z(\boldsymbol{\theta}_t \cdot \tilde{\mathbf{v}}_t) &\geq r_t^* - Z(\boldsymbol{\theta}_t \cdot \mathbf{v}_t^*) \\ \mathbb{E}[\tilde{r}_t - Z(\boldsymbol{\theta}_t \cdot \tilde{\mathbf{v}}_t) | H_{t-1}] &\geq \mathbb{E}[r_t^* | H_{t-1}] - Z(\boldsymbol{\theta}_t \cdot \mathbb{E}[\mathbf{v}_t^* | H_{t-1}]) \\ &\geq \frac{1}{T} \text{OPT} - Z(\boldsymbol{\theta}_t \cdot \frac{B}{T} \mathbf{1}). \end{aligned}$$

Summing above inequality for  $t = 1$  to  $\tau$  gives the lemma statement.  $\square$

**Lemma 9.**

$$\sum_{t=1}^{\tau} \boldsymbol{\theta}_t \cdot (\tilde{\mathbf{v}}_t - \frac{B}{T} \mathbf{1}) \geq B - \frac{\tau B}{T} - \mathcal{R}'(T).$$

*Proof.* Recall that  $g_t(\boldsymbol{\theta}_t) = \boldsymbol{\theta}_t \cdot (\tilde{\mathbf{v}}_t - \frac{B}{T} \mathbf{1})$ , therefore the LHS in the required inequality is  $\sum_{t=1}^{\tau} g_t(\boldsymbol{\theta}_t)$ . Let  $\boldsymbol{\theta}^* := \arg \max_{\|\boldsymbol{\theta}\|_1 \leq 1, \boldsymbol{\theta} \geq 0} \sum_{t=1}^{\tau} g_t(\boldsymbol{\theta})$ . We use the regret definition for the OLAlgorithm to get that  $\sum_{t=1}^{\tau} g_t(\boldsymbol{\theta}_t) \geq \sum_{t=1}^{\tau} g_t(\boldsymbol{\theta}^*) - \mathcal{R}(T)$ . Note that from the regret bound given in Lemma 4,  $\mathcal{R}(T) \leq \mathcal{R}'(T)$ .

**Case 1:**  $\tau < T$ . This means that  $\sum_{t=1}^{\tau} (\mathbf{v}_t(a_t) \cdot \mathbf{e}_j) \geq B$  for some  $j$ . Then from (15) and (17), it must be that  $\sum_{t=1}^{\tau} (\tilde{\mathbf{v}}_t \cdot \mathbf{e}_j) \geq B - \mathcal{R}'(T)$  so that  $\sum_{t=1}^{\tau} g_t(\boldsymbol{\theta}^*) \geq \sum_{t=1}^{\tau} g_t(\mathbf{e}_j) \geq B - \frac{\tau B}{T} - \mathcal{R}'(T)$ .

**Case 2:**  $\tau = T$ . In this case,  $B - \frac{\tau B}{T} = 0 = \sum_{t=1}^{\tau} g_t(\mathbf{0}) \leq \sum_{t=1}^{\tau} g_t(\boldsymbol{\theta}^*)$ , which completes the proof of the lemma.  $\square$

Now, we are ready to prove Theorem 2, which states that Algorithm 1 achieves a regret of  $Z\mathcal{R}'(T)$ .

**Proof of Theorem 2.** Substituting the inequality from Lemma 9 in Lemma 8, we get

$$\sum_{t=1}^{\tau} \mathbb{E}[\tilde{r}_t | H_{t-1}] \geq \frac{\tau}{T} \text{OPT} + ZB \left(1 - \frac{\tau}{T}\right) - Z\mathcal{R}'(T)$$

Also,  $Z \geq \frac{\text{OPT}}{B}$ . Substituting in above,

$$\begin{aligned} \mathbb{E}[\tilde{r}_{\text{sum}}] &= \sum_{t=1}^{\tau} \mathbb{E}[\tilde{r}_t | H_{t-1}] \geq \frac{\tau}{T} \text{OPT} + \text{OPT} \left(1 - \frac{\tau}{T}\right) - Z\mathcal{R}'(T) \\ &\geq \text{OPT} - Z\mathcal{R}'(T) \end{aligned}$$

From Steps 1 and 2, this implies a lower bound on  $\mathbb{E}[\sum_{t=1}^{\tau} r_t(a_t)]$ . The proof is now completed by using Azuma-Hoeffding to bound the actual total reward with high probability.  $\square$

## F Appendix for Section 3.3

**Proof of Lemma 5.** Let us define an “intermediate sample optimal” as:

$$\overline{\text{OPT}}^\gamma := \begin{array}{l} \max_q \\ \text{such that} \end{array} \frac{T}{T_0} \sum_{i=1}^{T_0} \boldsymbol{\mu}_*^\top X_i \pi(X_i) \quad (19)$$

$$\frac{T}{T_0} \sum_{i=1}^{T_0} W_*^\top X_i \pi(X_i) \leq B + \gamma$$

Above sample optimal knows the parameters  $\boldsymbol{\mu}_*$ ,  $W_*$ , the error comes only from approximating the expected value over context distribution by average over the observed contexts. We do not actually compute  $\overline{\text{OPT}}^\gamma$ , but will use it for the convenience of proof exposition. The proof involves two steps.

Step 1: Bound  $|\overline{\text{OPT}}^\gamma - \text{OPT}|$ .

Step 2: Bound  $|\hat{\text{OPT}}^{2\gamma} - \overline{\text{OPT}}^\gamma|$

**Step 1** bound can be borrowed from the work on Online Stochastic Convex Programming in [4]: since  $\boldsymbol{\mu}_*$ ,  $W_*$  is known, so there is effectively full information before making the decision, i.e., consider the vectors  $[\boldsymbol{\mu}_*^\top \mathbf{x}_t(a), W_*^\top \mathbf{x}_t(a)]$  as outcome vectors which can be observed for all arms  $a$  before choosing the distribution over arms to be played at time  $t$ , therefore, the setting in [4] applies. In fact,  $\hat{\text{OPT}}^\gamma$  as defined by Equation (F.10) in [4] when  $A_t = \{[\boldsymbol{\mu}_*^\top \mathbf{x}_t(a), W_*^\top \mathbf{x}_t(a)], a \in [K]\}$ ,  $f$  identity, and  $S = \{\mathbf{v}_{-1} \leq \frac{B}{T}\}$ , is same as  $\frac{1}{T}$  times  $\overline{\text{OPT}}^\gamma$  defined here. And using Lemma F.4 and Lemma F.6 in [4] (using  $L = 1$ ,  $Z^* = \text{OPT}/B$ ), we obtain that for any  $\gamma \geq \left(\frac{T}{T_0}\right) 2m\sqrt{T_0 \log(T_0) \log(T_0 d/\delta)}$ , with probability  $1 - O(\delta)$ ,

$$\text{OPT} - \gamma \leq \overline{\text{OPT}}^\gamma \leq \text{OPT} + 2\gamma\left(\frac{\text{OPT}}{B} + 1\right). \quad (20)$$

For **Step 2**, we show that with probability  $1 - \delta$ , for all  $\pi$ ,  $\gamma \geq \left(\frac{T}{T_0}\right) 2m\sqrt{T_0 \log(T_0) \log(T_0 d/\delta)}$

$$\left| \sum_{i=1}^{T_0} (\hat{\boldsymbol{\mu}}_i - \boldsymbol{\mu}_*)^\top X_i \pi(X_i) \right| \leq \gamma \quad (21)$$

$$\left\| \frac{T}{T_0} \sum_{i=1}^{T_0} (\hat{W}_i - W_*)^\top X_i \pi(X_i) \right\|_\infty \leq \gamma \quad (22)$$

This is sufficient to prove both lower and upper bound on  $\hat{\text{OPT}}^{2\gamma}$  for  $\gamma \geq \left(\frac{T}{T_0}\right) 2m\sqrt{T_0 \log(T_0) \log(T_0 d/\delta)}$ . For lower bound, we can simply use (22) for optimal policy for  $\overline{\text{OPT}}^\gamma$ , denoted by  $\bar{\pi}$ . This implies that (because of relaxation of distance constraint by  $\gamma$ )  $\bar{\pi}$  is a feasible primal solution for  $\hat{\text{OPT}}^{2\gamma}$ , and therefore using (20) and (21),

$$\hat{\text{OPT}}^{2\gamma} + \gamma \geq \overline{\text{OPT}}^\gamma \geq \text{OPT} - \gamma.$$

For the upper bound, we can use (22) for the optimal policy  $\hat{\pi}$  for  $\hat{\text{OPT}}^{2\gamma}$ . Then, using (20) and (21),

$$\hat{\text{OPT}}^{2\gamma} \leq \overline{\text{OPT}}^{3\gamma} + \gamma \leq \text{OPT} + 6\gamma\left(\frac{\text{OPT}}{B} + 1\right) + \gamma.$$

Combining, this proves the desired lemma statement:

$$\text{OPT} - 2\gamma \leq \hat{\text{OPT}}^{2\gamma} \leq \text{OPT} + 7\gamma\left(\frac{\text{OPT}}{B} + 1\right) \quad (23)$$

What remains is to proof the claim in (21) and (22). We show the proof for (22), the proof for (21) is similar. Observe that for any  $\pi$ ,

$$\begin{aligned} \left\| \sum_{t=1}^{T_0} (\hat{W}_t - W_*)^\top X_t \pi(X_t) \right\|_\infty &\leq \sum_{t=1}^{T_0} \|(\hat{W}_t - W_*)^\top X_t \pi(X_t)\|_\infty \\ &\leq \sum_{t=1}^{T_0} \|\hat{W}_t - W_*\|_{M_t} \|X_t \pi(X_t)\|_{M_t^{-1}} \end{aligned}$$

where  $\|\hat{W}_t - W_*\|_{M_t} = \max_j \|\hat{\mathbf{w}}_{tj} - \mathbf{w}_{*j}\|_{M_t}$ .

Now, applying Lemma 2 to every column  $\hat{\mathbf{w}}_{tj}$  of  $\hat{W}_t$ , we have that with probability  $1 - \delta$  for all  $t$ ,

$$\|\hat{W}_t - W_*\|_{M_t} \leq 2\sqrt{m \log(td/\delta)} \leq 2\sqrt{m \log(T_0d/\delta)}$$

And, by choice of  $p_t$

$$\|X_t \pi(X_t)\|_{M_t^{-1}} \leq \|X_t p_t\|_{M_t^{-1}}.$$

Also, by Lemma 3,

$$\sum_{t=1}^{T_0} \|X_t p_t\|_{M_t^{-1}} \leq \sqrt{m T_0 \ln(T_0)}$$

Therefore, substituting,

$$\begin{aligned} \left\| \sum_{t=1}^{T_0} (\hat{W}_t - W_*)^\top X_t \pi(X_t) \right\|_\infty &\leq (2\sqrt{m \log(T_0d/\delta)}) \sum_{t=1}^{T_0} \|X_t p_t\|_{M_t^{-1}} \\ &\leq (2\sqrt{m \log(T_0d/\delta)}) \sqrt{m T_0 \ln(T_0)} \\ &\leq \frac{T_0}{T} \gamma \end{aligned}$$

□
